# Supplementary material
Source: PubMed Central journal article supplement (PMC4409022)
Supplement: JCI78450sd.pdf [file JCI78450sd.pdf]

**Supplemental Table 1 | Full RSV-F IgG ELISA Titers for Figure 9A**

| Expt    | Immunogen | Animal Number <sup>A</sup> |      |      |      |      |      | Avg. <sup>A</sup> | s.d. <sup>A</sup> | P value <sup>B</sup><br>vs sF | P value <sup>B</sup><br>vs wtRSV |
|---------|-----------|----------------------------|------|------|------|------|------|-------------------|-------------------|-------------------------------|----------------------------------|
|         |           | 1                          | 2    | 3    | 4    | 5    | 6    |                   |                   |                               |                                  |
| No. 194 | sF        | 19.6                       | 20.6 | 20.6 | 20.6 | 21.6 |      | 20.6              | 0.7               |                               |                                  |
|         | wtRSV     | 17.6                       | 15.6 | 16.6 | 17.6 | 16.6 |      | 16.8              | 0.8               |                               |                                  |
|         | VLP-19    | 17.6                       | 16.6 | 17.6 | 17.6 | 16.6 |      | 17.2              | 0.5               | 2.8x10 <sup>-5</sup> *        | 0.40                             |
|         | VLP-93    | 15.6                       | 16.6 | 17.6 | 16.6 | 17.6 |      | 16.8              | 0.8               | 5.5x10 <sup>-5</sup> *        | 1.0                              |
| No. 185 | sF        | 18.6                       | 18.6 | 19.6 | 18.6 | 18.6 | 18.6 | 18.8              | 0.4               |                               |                                  |
|         | wtRSV     | 16.6                       | 16.6 | 15.6 | 15.6 | 16.6 | 16.6 | 16.3              | 0.5               |                               |                                  |
|         | VLP-75    | 14.6                       | 15.6 | 14.6 | 16.6 | 14.6 | 16.6 | 15.4              | 1.0               | 1.7x10 <sup>-5</sup> *        | 0.096                            |
| No. 188 | sF        | 22.3                       | 21.3 | 22.3 | 20.3 | 22.3 | 22.3 | 21.8              | 0.8               |                               |                                  |
|         | wtRSV     | 13.6                       | 12.6 | 14.6 | 12.6 | 13.6 | 12.6 | 13.3              | 0.8               |                               |                                  |
|         | VLP-87    | 19.9                       | 19.9 | 18.9 | 18.9 | 18.9 | 17.9 | 19.1              | 0.8               | 1.4x10 <sup>-4</sup> *        | 1.6x10 <sup>-7</sup> †           |
| No. 190 | sF        | 18.6                       | 18.6 | 18.6 | 18.6 | 18.6 |      | 18.6              | 0                 |                               |                                  |
|         | wtRSV     | 13.6                       | 9.6  | 12.6 | 10.6 | 10.6 |      | 11.4              | 1.6               |                               |                                  |
|         | VLP-90    | 7.6                        | 9.6  | 12.6 | 10.6 | 7.6  |      | 9.6               | 2.1               | 1.3x10 <sup>-5</sup> *        | 0.17                             |
| No. 183 | sF        | 17.6                       | 17.6 | 17.6 | 17.6 | 17.6 |      | 17.6              | 0                 |                               |                                  |
|         | wtRSV     | 13.6                       | 14.6 | 13.6 | 15.6 | 15.6 |      | 14.6              | 1.0               |                               |                                  |
|         | VLP-97    | 15.6                       | 17.6 | 17.6 | 15.6 | 15.6 |      | 16.4              | 1.1               | 4.0x10 <sup>-2</sup> *        | 0.027 †                          |

<sup>A</sup>Log2 endpoint dilution titers are listed for individual animals as well as for average (Avg.) and standard deviation (s.d.)

<sup>B</sup>P value compared to the sF or wtRSV controls within each experiment calculated by Student's T Test. Significant difference (p<0.05) is indicated by \* and † for sF and wtRSV controls, respectively.

**Supplemental Table 2 | Full RSV Microneutralization Titers for Figure 9C**

| Expt    | Immunogen | Animal Number <sup>A</sup> |       |       |      |       |      | Avg. <sup>A</sup> | s.d. <sup>A</sup> | P value <sup>B</sup><br>vs sF | P value <sup>B</sup><br>vs wtRSV |
|---------|-----------|----------------------------|-------|-------|------|-------|------|-------------------|-------------------|-------------------------------|----------------------------------|
|         |           | 1                          | 2     | 3     | 4    | 5     | 6    |                   |                   |                               |                                  |
| No. 194 | sF        | 7.48                       | 10.02 | 10.25 | 6.49 | 11.16 |      | 9.1               | 2.0               |                               |                                  |
|         | wtRSV     | 6.7                        | 6.5   | 6.5   | 7.3  | 6.5   |      | 6.7               | 0.4               |                               |                                  |
|         | VLP-19    | 3.3                        | 3.3   | 5.26  | 8.09 | 9.33  |      | 5.9               | 2.8               | 0.067                         | 0.51                             |
|         | VLP-93    | 5.49                       | 8.15  | 5.92  | 3.32 | 10.47 |      | 6.7               | 2.7               | 0.15                          | 0.98                             |
| No. 185 | sF        | 10.4                       | 7.6   | 10.3  | 9.7  | 10.9  | 11.1 | 10.0              | 1.3               |                               |                                  |
|         | wtRSV     | 4.9                        | 4.9   | 6.3   | 4.9  | 6.5   | 4.9  | 5.4               | 0.8               |                               |                                  |
|         | VLP-75    | 3.3                        | 3.3   | 5.8   | 3.3  | 7.7   | 4.9  | 4.7               | 1.8               | 1.6x10 <sup>-4</sup> *        | 0.41                             |
| No. 188 | sF        | 8.1                        | 8.1   | 8.7   | 8.1  | 8.1   | 10.1 | 8.5               | 0.8               |                               |                                  |
|         | wtRSV     | 4.1                        | 4.3   | 4.9   | 4.9  | 4.9   | 3.3  | 4.4               | 0.6               |                               |                                  |
|         | VLP-87    | 12.3                       | 5.8   | 10.6  | 4.9  | 4.9   | 4.9  | 7.2               | 3.3               | 0.37                          | 0.068                            |
| No. 190 | sF        | 10.41                      | 10.9  | 12.8  | 10.2 | 10.3  |      | 10.9              | 1.1               |                               |                                  |
|         | wtRSV     | 4.9                        | 3.3   | 3.3   | 4.9  | 4.9   |      | 4.3               | 0.9               |                               |                                  |
|         | VLP-90    | 3.32                       | 7.2   | 3.3   | 3.3  | 3.3   |      | 4.1               | 1.7               | 7.2x10 <sup>-5</sup> *        | 0.84                             |
| No. 183 | sF        | 9.7                        | 11.4  | 11.4  | 12.8 | 8.1   |      | 10.7              | 1.8               |                               |                                  |
|         | wtRSV     | 4.9                        | 6.5   | 4.9   | 4.7  | 4.8   |      | 5.2               | 0.8               |                               |                                  |
|         | VLP-97    | 9.7                        | 4.9   | 12.2  | 5.5  | 9.4   |      | 8.3               | 3.1               | 0.18                          | 0.055                            |

<sup>A</sup>Log<sub>2</sub> endpoint dilution titers are listed for individual animals as well as for average (Avg.) and standard deviation (s.d.)

<sup>B</sup>P value compared to the sF or wtRSV controls within each experiment calculated by Student's T Test. Significant difference (p<0.05) is indicated by \* and † for sF and wtRSV controls, respectively.

**Supplemental Table 3 | Full RSV Lung Titers for Figure 9D**

| Expt    | Immunogen | Animal Number <sup>A</sup> |     |     |     |     |     | Avg. <sup>A</sup> | s.d. <sup>A</sup> | P value <sup>B</sup><br>vs sF | P value <sup>B</sup><br>vs wtRSV |
|---------|-----------|----------------------------|-----|-----|-----|-----|-----|-------------------|-------------------|-------------------------------|----------------------------------|
|         |           | 1                          | 2   | 3   | 4   | 5   | 6   |                   |                   |                               |                                  |
| No. 194 | sF        | 1.3                        | 1.1 | 1.2 | 1.3 | 1.2 |     | 1.2               | 0.1               |                               |                                  |
|         | wtRSV     | 1.1                        | 1.2 | 1.0 | 0.9 | 1.1 |     | 1.1               | 0.1               |                               |                                  |
|         | VLP-19    | 2.7                        | 2.9 | 1   | 1.1 | 1   |     | 1.7               | 1.0               | 0.27                          | 0.16                             |
|         | VLP-93    | 1.1                        | 1.6 | 1.8 | 2.4 | 1.1 |     | 1.6               | 0.5               | 0.16                          | 0.061                            |
| No. 185 | sF        | 1.2                        | 1.1 | 1.1 | 1.1 | 1.2 | 1.3 | 1.2               | 0.1               |                               |                                  |
|         | wtRSV     | 1.3                        | 1.0 | 1.1 | 1.1 | 1.1 | 1.1 | 1.1               | 0.1               |                               |                                  |
|         | VLP-75    | 4.2                        | 2   | 1.8 | 1.3 | 1.1 | 5.3 | 2.6               | 1.7               | 0.067                         | 0.059                            |
| No. 188 | sF        | 1.1                        | 1.1 | 1.1 | 1.1 | 1.2 | 1.2 | 1.1               | 0.1               |                               |                                  |
|         | wtRSV     | 1.1                        | 1.1 | 1.2 | 1.1 | 1.2 | 1.2 | 1.0               | 0.1               |                               |                                  |
|         | VLP-87    | 1.3                        | 1.4 | 1.0 | 3.4 | 3.0 | 1.8 | 2.0               | 1.0               | 0.061                         | 0.065                            |
| No. 190 | sF        | 0.8                        | 0.9 | 0.9 | 0.9 | 1.0 |     | 0.9               | 0.1               |                               |                                  |
|         | wtRSV     | 1.0                        | 0.8 | 2.6 | 0.8 | 1.0 |     | 1.2               | 0.8               |                               |                                  |
|         | VLP-90    | 0.9                        | 1.9 | 0.9 | 1.1 | 0.9 |     | 1.1               | 0.4               | 0.26                          | 0.81                             |
| No. 183 | sF        | 1.1                        | 1.1 | 1.1 | 1.1 | 1.1 |     | 1.1               | 0                 |                               |                                  |
|         | wtRSV     | 1.1                        | 1.1 | 1.1 | 1.1 | 1.1 |     | 1.1               | 0                 |                               |                                  |
|         | VLP-97    | 2.7                        | 2.4 | 3.1 | 2.7 | 1.1 |     | 2.4               | 0.8               | 0.0054 *                      | 0.005 †                          |

<sup>A</sup>Log10 endpoint dilution titers are listed for individual animals as well as for average (Avg.) and standard deviation (s.d.)

<sup>B</sup>P value compared to the sF or wtRSV controls within each experiment calculated by Student's T Test. Significant difference (p<0.05) is indicated by \* and † for sF and wtRSV controls, respectively.
